# Supplementary material
Source: PubMed Central journal article supplement (PMC7769002)
Supplement: NIHMS1655203-supplement-Appendix.pdf [file NIHMS1655203-supplement-Appendix.pdf]

## Appendix

### Table of Contents:

1. Number of admissions and exclusions for sample
2. Sensitivity of results in Exhibit 2 to missing zip code data
3. Estimation of standard errors for comparing changes over time in admission rates
4. Change in COVID-19 and non-COVID-19 Admissions Relative to Equivalent Periods in 2019: Total and by Subgroup with confidence intervals (an expansion of Exhibit 2 in text)
5. Non-COVID-19 change in admissions by diagnosis (with confidence intervals)
6. Total change in medical admissions by diagnosis (with confidence intervals)
7. In-hospital mortality logistic regression model output
8. ICD-10 codes used to categorize medical admissions by primary diagnosis.
9. Supplemental Exhibits 1–4

### 1. Sample Selection

Notes: The sample was pulled from Sound Physician records as of July 14, 2020. The composition of the initial sample through Week 24, and the basic sample used for analysis, is shown below.

| Sample           | Deletions | Explanations                                                               |
|------------------|-----------|----------------------------------------------------------------------------|
| 1,152,429        |           | Initial Sample                                                             |
|                  | -51,534   | Critical Care Hospitals                                                    |
| 1,100,895        |           |                                                                            |
|                  | -43,895   | Incomplete Hosp. Coverage                                                  |
| 1,057,000        |           |                                                                            |
|                  | -49       | Hospitals with fewer than 50 admissions                                    |
| <b>1,056,951</b> |           | = Total Admissions in 2019 & 2020<br>(505,060 in 2020 and 551,891 in 2019) |

## 2. Sensitivity of results in supplemental exhibit 2 to missing zip code data

One concern with our analysis is the possibility of bias if patients without a zip code in their record are systematically different from those with zip codes. To address this problem, we limited our sample to one in which the zip code response at the hospital level was at least 90%. For example, if we consider the change in admissions among Black patients; for this restricted sample ( $N = 4,519$  at baseline rather than 5,140 in the full sample) the decline for non-COVID-19 medical admissions was -45.7 (in contrast to -45.2 in supplemental exhibit 2) at the nadir in April, and -11.9 (the same as in the full sample) during the rebound. Including COVID-19 admissions the decline at the nadir was -30.6 (in contrast to -30.1 in the full sample) and -2.9 for the rebound (in contrast to -2.3). In other words, the estimates were virtually unchanged. For this reason, we do not think that this selection issue is biasing our results.

## 3. Estimation standard errors for comparing changes over time in admission rates

In this section, we show how we calculate confidence intervals for our analysis of proportional declines. Let  $y$  be the count for a given month  $k$  in 2020 and  $x$  the corresponding count in 2019. The proportional decline  $d$  is therefore

$$A.1 \quad d = (y - x) / x$$

Assuming independence for the admission “draws” across the two years, the variance of  $d$  can be approximated by

$$A.2 \quad \text{Var}(d) \cong \text{Var}(x)[E(y) / (E(x)^2)] + \text{Var}(y) / E(x)$$

We treat these as binary draws in the universe of admissions for month  $k$  in 2019 and 2020. We further multiply this ratio by a constant term to normalize (or propensity weight) so that the number of admissions during the baseline (February) in 2019 is equal to the number of admissions during the baseline in 2020.

Confidence intervals can then be calculated in the usual way. We are very grateful to James O’Malley for suggesting this approach; any errors are our own.

**4: Change in COVID-19 and non-COVID-19 Admissions Relative to Equivalent Periods in 2019: Total and by Subgroup with confidence intervals (an expansion of supplemental exhibit 2)**

| Patient Subgroup<br>(N of sample at<br>2020 Baseline) | <i>Non-COVID-19 admissions</i>               |                                                    | <i>All medical admissions</i>                |                                                    |
|-------------------------------------------------------|----------------------------------------------|----------------------------------------------------|----------------------------------------------|----------------------------------------------------|
|                                                       | Nadir<br>(April)<br>Change (%)<br>[95% C.I.] | Rebound<br>(June/July)<br>Change (%)<br>[95% C.I.] | Nadir<br>(April)<br>Change (%)<br>[95% C.I.] | Rebound<br>(June/July)<br>Change (%)<br>[95% C.I.] |
| Overall                                               | -42.8                                        | -15.9                                              | -34.1                                        | -8.3                                               |
| (N = 105,688)                                         | [-43.2, -42.4]                               | [-16.5, -15.4]                                     | [-34.6, -33.6]                               | [-8.9, -7.7]                                       |
| Race, Ethnicity and Poverty Status                    |                                              |                                                    |                                              |                                                    |
| Zip > 50% Black                                       | -45.2                                        | -11.9                                              | -30.1                                        | -2.3                                               |
| (N = 5,140)                                           | [-47.2, -43.3]                               | [-14.7, -9.2]                                      | [-32.3, -27.8]                               | [-5.3, 0.6]                                        |
| Zip > 50% Hispanic                                    | -44.2                                        | -31.8                                              | -34.8                                        | -14.1                                              |
| (N = 9,161)                                           | [-45.7, -42.8]                               | [-33.4, -30.1]                                     | [-36.4, -33.3]                               | [-16.0, -12.2]                                     |
| Zip > 25% Poverty                                     | -44.0                                        | -16.7                                              | -31.5                                        | -2.7                                               |
| (N = 6,761)                                           | [-45.7, -42.4]                               | [-18.9, -14.5]                                     | [-33.4, -29.6]                               | [-5.2, -0.2]                                       |
| Insurance Status                                      |                                              |                                                    |                                              |                                                    |
| Medicaid                                              | -41.4                                        | -9.7                                               | -31.2                                        | -2.5                                               |
| (N = 13,009)                                          | [-42.6, -40.1]                               | [-11.4, -8.0]                                      | [-32.6, -29.8]                               | [-4.3, -0.6]                                       |
| Self-Pay                                              | -37.7                                        | -20.3                                              | -27.3                                        | -3.7                                               |
| (N = 2,922)                                           | [-40.4, -35.0]                               | [-23.4, -17.3]                                     | [-30.3, -24.3]                               | [-7.2, -0.1]                                       |
| Age                                                   |                                              |                                                    |                                              |                                                    |
| Old (70+)                                             | -45.4                                        | -19.1                                              | -37.5                                        | -13.2                                              |
| (N = 42,384)                                          | [-46.1, -44.8]                               | [-20.0, -18.3]                                     | [-38.2, -36.8]                               | [-14.1, -12.2]                                     |
| Young (< 50)                                          | -39.3                                        | -13.4                                              | -30.4                                        | -3.4                                               |
| (N = 23,636)                                          | [-40.2, -38.3]                               | [-14.6, -12.2]                                     | [-31.4, -29.4]                               | [-4.7, -2.1]                                       |
| Hospital COVID-19 Volume                              |                                              |                                                    |                                              |                                                    |
| Highest quintile                                      | -50.0                                        | -23.3                                              | -31.2                                        | -9.9                                               |
| (N = 21,285)                                          | [-50.9, -49.1]                               | [-24.4, -22.1]                                     | [-32.3, -30.1]                               | [-11.2, -8.7]                                      |
| Lowest quintile                                       | -39.5                                        | -6.8                                               | -36.5                                        | -5.5                                               |
| (N = 21,231)                                          | [-40.5, -38.5]                               | [-8.1, -5.5]                                       | [-37.5, -35.5]                               | [-6.8, -4.1]                                       |

Notes: Source is Sound Physician Data. These estimates adjust for seasonality by use of the corresponding weeks for 2019 data. The sample size is for the initial (baseline) February 2020 admissions.

## 5. Non-COVID-19 Change in Admissions by Diagnosis (with Confidence Intervals)

| Diagnosis                                          | N (2020 baseline) | Non-Covid-19 (April) | Lower 95% C.I. (April) | Upper 95% C.I. (April) | Non-Covid-19 (June/July) | Lower 95% C.I. (June/July) | Upper 95% C.I. (June/July) |
|----------------------------------------------------|-------------------|----------------------|------------------------|------------------------|--------------------------|----------------------------|----------------------------|
| Abdominal Pain                                     | 4893              | -48.5                | -50.3                  | -46.6                  | -14.4                    | -17.0                      | -11.8                      |
| Acute Myocardial Infarction (Non-ST-Elevation)     | 1568              | -42.2                | -45.7                  | -38.6                  | -16.1                    | -20.8                      | -11.4                      |
| Acute Myocardial Infarction (ST-Elevated)          | 416               | -34.9                | -42.4                  | -27.5                  | -22.2                    | -30.7                      | -13.8                      |
| Alcohol-Related                                    | 1042              | -32.6                | -37.3                  | -27.9                  | 4.3                      | -2.0                       | 10.6                       |
| Altered Mental Status                              | 2251              | -27.1                | -30.5                  | -23.6                  | -15.5                    | -19.3                      | -11.7                      |
| Arrythmia                                          | 3626              | -47.2                | -49.5                  | -45.0                  | -14.7                    | -17.7                      | -11.6                      |
| Chest Pain (Excluding Acute Myocardial Infarction) | 7383              | -46.0                | -47.6                  | -44.4                  | -14.6                    | -16.7                      | -12.5                      |
| Chronic Obstructive Pulmonary Disease / Asthma     | 3192              | -68.6                | -70.4                  | -66.7                  | -40.1                    | -42.8                      | -37.4                      |
| Congestive Heart Failure                           | 3878              | -47.5                | -49.7                  | -45.3                  | -20.1                    | -23.0                      | -17.2                      |
| Dehydration                                        | 4446              | -33.7                | -36.0                  | -31.4                  | -12.5                    | -15.2                      | -9.8                       |
| Diabetes                                           | 2283              | -38.5                | -41.5                  | -35.5                  | 0.8                      | -3.2                       | 4.9                        |
| Gastrointestinal Bleeding                          | 4042              | -38.8                | -41.1                  | -36.6                  | -11.9                    | -14.9                      | -8.9                       |
| Pancreatitis                                       | 1151              | -23.7                | -28.6                  | -18.8                  | -4.5                     | -10.2                      | 1.2                        |
| Pneumonia                                          | 3953              | -53.6                | -55.6                  | -51.6                  | -44.1                    | -46.4                      | -41.8                      |
| Respiratory Failure                                | 5986              | -44.8                | -46.6                  | -43.0                  | -21.0                    | -23.4                      | -18.6                      |
| Sepsis and Sepsis Shock                            | 6712              | -40.1                | -41.9                  | -38.3                  | -25.1                    | -27.1                      | -23.1                      |
| Skin and Soft Tissue Infection                     | 2806              | -44.0                | -46.6                  | -41.4                  | -19.0                    | -22.2                      | -15.7                      |
| Stroke                                             | 2350              | -24.7                | -28.2                  | -21.1                  | -16.9                    | -20.6                      | -13.3                      |
| Transient Ischemic Attack                          | 1082              | -50.9                | -54.8                  | -47.0                  | -11.4                    | -17.2                      | -5.7                       |
| Urinary Tract Infection                            | 2296              | -48.5                | -51.2                  | -45.7                  | -24.3                    | -27.7                      | -20.9                      |

## 6. Total Change in Medical Admissions by Diagnosis (with Confidence Intervals)

| Diagnosis                                          | N (2020 baseline) | Non-Covid-19 (April) | Lower 95% C.I. (April) | Upper 95% C.I. (April) | Non-Covid-19 (June/July) | Lower 95% C.I. (June/July) | Upper 95% C.I. (June/July) |
|----------------------------------------------------|-------------------|----------------------|------------------------|------------------------|--------------------------|----------------------------|----------------------------|
| Abdominal Pain                                     | 4893              | -46.1                | -48.0                  | -44.2                  | -11.9                    | -14.5                      | -9.2                       |
| Acute Myocardial Infarction (Non-ST-Elevation)     | 1568              | -39.4                | -43.0                  | -35.7                  | -14.4                    | -19.2                      | -9.7                       |
| Acute Myocardial Infarction (ST-Elevated)          | 416               | -33.1                | -40.7                  | -25.5                  | -21.1                    | -29.6                      | -12.5                      |
| Alcohol-Related                                    | 1042              | -30.5                | -35.3                  | -25.7                  | 5.8                      | -0.6                       | 12.1                       |
| Altered Mental Status                              | 2251              | -18.9                | -22.6                  | -15.2                  | -11.2                    | -15.1                      | -7.3                       |
| Arrhythmia                                         | 3626              | -44.2                | -46.5                  | -41.9                  | -12.3                    | -15.4                      | -9.2                       |
| Chest Pain (Excluding Acute Myocardial Infarction) | 7383              | -44.0                | -45.6                  | -42.4                  | -13.0                    | -15.2                      | -10.8                      |
| Chronic Obstructive Pulmonary Disease / Asthma     | 3192              | -61.6                | -63.6                  | -59.6                  | -35.5                    | -38.4                      | -32.7                      |
| Congestive Heart Failure                           | 3878              | -43.8                | -46.1                  | -41.6                  | -17.8                    | -20.7                      | -14.8                      |
| Dehydration                                        | 4446              | -29.4                | -31.7                  | -27.0                  | -9.7                     | -12.4                      | -7.0                       |
| Diabetes                                           | 2283              | -35.8                | -38.9                  | -32.8                  | 3.5                      | -0.6                       | 7.6                        |
| Gastrointestinal Bleeding                          | 4042              | -36.9                | -39.2                  | -34.6                  | -9.7                     | -12.7                      | -6.7                       |
| Pancreatitis                                       | 1151              | -22.4                | -27.3                  | -17.4                  | -2.9                     | -8.7                       | 2.8                        |
| Pneumonia                                          | 3953              | -16.0                | -18.9                  | -13.1                  | -19.6                    | -22.5                      | -16.7                      |
| Respiratory Failure                                | 5986              | -11.8                | -14.3                  | -9.4                   | 11.1                     | 7.9                        | 14.2                       |
| Sepsis and Sepsis Shock                            | 6712              | -24.8                | -26.9                  | -22.8                  | -14.4                    | -16.6                      | -12.2                      |
| Skin and Soft Tissue Infection                     | 2806              | -42.5                | -45.1                  | -39.9                  | -18.1                    | -21.4                      | -14.9                      |
| Stroke                                             | 2350              | -23.1                | -26.7                  | -19.5                  | -15.8                    | -19.6                      | -12.1                      |
| Transient Ischemic Attack                          | 1082              | -50.0                | -54.0                  | -46.1                  | -10.8                    | -16.6                      | -5.0                       |
| Urinary Tract Infection                            | 2296              | -46.2                | -49.0                  | -43.4                  | -22.0                    | -25.5                      | -18.5                      |

## 7. In-Hospital Mortality Logistic Regression Model Output

```

Logistic regression          Number of obs   =   483,246
                             Wald chi2(46)       =   6844.43
                             Prob > chi2        =   0.0000
Log pseudolikelihood = -42302.104   Pseudo R2      =   0.0921
  
```

(Std. Err. adjusted for 158 clusters in hosp\_id)

|                                           |           | Robust     |           |       |          |                      |
|-------------------------------------------|-----------|------------|-----------|-------|----------|----------------------|
|                                           | mortality | Odds Ratio | Std. Err. | z     | P> z     | [95% Conf. Interval] |
| -----+-----                               |           |            |           |       |          |                      |
| Age (<= 20 Excluded)                      |           |            |           |       |          |                      |
| 21-40                                     | 2.204523  | .746307    | 2.34      | 0.020 | 1.135412 | 4.280314             |
| 41-50                                     | 3.423283  | 1.14867    | 3.67      | 0.000 | 1.773476 | 6.607851             |
| 51-60                                     | 4.376513  | 1.431846   | 4.51      | 0.000 | 2.304857 | 8.310218             |
| 61-70                                     | 5.812435  | 1.905556   | 5.37      | 0.000 | 3.057026 | 11.05139             |
| 71-80                                     | 7.434346  | 2.412555   | 6.18      | 0.000 | 3.93564  | 14.04333             |
| 81+                                       | 11.00684  | 3.615182   | 7.30      | 0.000 | 5.782113 | 20.95264             |
|                                           |           |            |           |       |          |                      |
| Sex (Male excluded)                       |           |            |           |       |          |                      |
| Female                                    | .8332931  | .0199447   | -7.62     | 0.000 | .795105  | .8733155             |
| Unknown                                   | .6398786  | .1541209   | -1.85     | 0.064 | .3990961 | 1.02593              |
|                                           |           |            |           |       |          |                      |
| Diagnosis                                 |           |            |           |       |          |                      |
| Altered Mental Status                     | 3.268721  | .2523323   | 15.34     | 0.000 | 2.809755 | 3.802658             |
| Acute Myocardial Infarction (ST-Elevated) | 5.970948  | .6990818   | 15.26     | 0.000 | 4.746617 | 7.511081             |
| Arrythmia                                 | 5.101967  | .4492339   | 18.51     | 0.000 | 4.293272 | 6.062991             |

|                                                    |  |          |          |        |       |          |          |
|----------------------------------------------------|--|----------|----------|--------|-------|----------|----------|
| Chest Pain (Excluding Acute Myocardial Infarction) |  | .2861345 | .0299629 | -11.95 | 0.000 | .2330429 | .3513215 |
| Congestive Heart Failure                           |  | 1.992648 | .1598087 | 8.60   | 0.000 | 1.702805 | 2.331826 |
| Chronic Obstructive Pulmonary Disease / Asthma     |  | 1.148187 | .1186509 | 1.34   | 0.181 | .937673  | 1.405962 |
| Dehydration                                        |  | 1.997709 | .1482296 | 9.33   | 0.000 | 1.727322 | 2.310422 |
| Diabetes                                           |  | 1.089967 | .1095888 | 0.86   | 0.392 | .8950164 | 1.327383 |
| Gastrointestinal Bleeding                          |  | 1.709683 | .1243315 | 7.37   | 0.000 | 1.482568 | 1.97159  |
| Pancreatitis                                       |  | .7565213 | .1177853 | -1.79  | 0.073 | .557564  | 1.026473 |
| Pneumonia                                          |  | 2.886934 | .2007386 | 15.25  | 0.000 | 2.519126 | 3.308445 |
| Sepsis and Sepsis Shock                            |  | 6.061807 | .4004572 | 27.28  | 0.000 | 5.325614 | 6.899767 |
| Skin and Soft Tissue Infection                     |  | .6629163 | .0766232 | -3.56  | 0.000 | .5285336 | .8314667 |
| Stroke                                             |  | 4.582324 | .4307566 | 16.19  | 0.000 | 3.811267 | 5.509372 |
| Transient Ischemic Attack                          |  | .1964328 | .05624   | -5.68  | 0.000 | .1120752 | .3442855 |
| Urinary Tract Infection                            |  | .7215911 | .0748321 | -3.15  | 0.002 | .588868  | .8842282 |
| Alcohol-Related                                    |  | .9206229 | .1596569 | -0.48  | 0.633 | .6553361 | 1.2933   |
| Respiratory Failure                                |  | 6.373872 | .4164225 | 28.35  | 0.000 | 5.607794 | 7.244604 |
| Acute Myocardial Infarction (Non-ST-Elevation)     |  | 2.315979 | .2023599 | 9.61   | 0.000 | 1.951464 | 2.748583 |
|                                                    |  |          |          |        |       |          |          |
| disad#xweek#year                                   |  |          |          |        |       |          |          |
| Low Minority/Poverty ZIP#February#2020             |  | .9836002 | .0599268 | -0.27  | 0.786 | .8728875 | 1.108355 |
| Low Minority/Poverty ZIP#March#2019                |  | .9349855 | .0556924 | -1.13  | 0.259 | .8319612 | 1.050768 |
| Low Minority/Poverty ZIP#March#2020                |  | 1.03099  | .0595713 | 0.53   | 0.597 | .920601  | 1.154615 |
| Low Minority/Poverty ZIP#April#2019                |  | .9082435 | .0490327 | -1.78  | 0.075 | .8170509 | 1.009614 |
| Low Minority/Poverty ZIP#April#2020                |  | 1.108438 | .0754999 | 1.51   | 0.131 | .9699132 | 1.266747 |
| Low Minority/Poverty ZIP#May#2019                  |  | .8400889 | .0448532 | -3.26  | 0.001 | .7566217 | .9327639 |
| Low Minority/Poverty ZIP#May#2020                  |  | .983758  | .0645222 | -0.25  | 0.803 | .8650878 | 1.118707 |
| Low Minority/Poverty ZIP#June#2019                 |  | .825338  | .0451739 | -3.51  | 0.000 | .7413825 | .9188006 |
| Low Minority/Poverty ZIP#June#2020                 |  | .8777937 | .051412  | -2.23  | 0.026 | .7825966 | .9845708 |
| High Minority/Poverty ZIP#February#2019            |  | .9182197 | .0903388 | -0.87  | 0.386 | .7571839 | 1.113504 |

```

High Minority/Poverty ZIP#February#2020 | 1.026139 .0883779 0.30 0.764 .866752 1.214835
High Minority/Poverty ZIP#March#2019 | 1.060943 .1060318 0.59 0.554 .8722117 1.290512
High Minority/Poverty ZIP#March#2020 | 1.064488 .1041688 0.64 0.523 .8787063 1.289549
High Minority/Poverty ZIP#April#2019 | .8979502 .0999325 -0.97 0.333 .7219754 1.116817
High Minority/Poverty ZIP#April#2020 | 1.387924 .1592424 2.86 0.004 1.108418 1.737911
High Minority/Poverty ZIP#May#2019 | .8859858 .0796272 -1.35 0.178 .7428922 1.056642
High Minority/Poverty ZIP#May#2020 | 1.036867 .1232831 0.30 0.761 .8213259 1.308973
High Minority/Poverty ZIP#June#2019 | .8532207 .0827773 -1.64 0.102 .7054724 1.031912
High Minority/Poverty ZIP#June#2020 | .8876334 .087441 -1.21 0.226 .7317816 1.076678
|
_cons | .0014751 .0004817 -19.97 0.000 .0007779 .0027975

```

-----  
Note: \_cons estimates baseline odds.

```
. margins xweek#disad if year == 2020
```

```
Predictive margins      Number of obs      =      215,970
```

```
Model VCE      : Robust
```

```
Expression      : Pr(mortality), predict()
```

```
-----+-----
```

|                                    | Margin   | Std. Err. | z     | P> z  | [95% Conf. Interval] |
|------------------------------------|----------|-----------|-------|-------|----------------------|
| xweek#disad                        |          |           |       |       |                      |
| February#Low Minority/Poverty ZIP  | .0203984 | .0011584  | 17.61 | 0.000 | .018128 .0226689     |
| February#High Minority/Poverty ZIP | .0212438 | .0016588  | 12.81 | 0.000 | .0179927 .0244949    |



|                                 |  |          |          |       |       |          |          |
|---------------------------------|--|----------|----------|-------|-------|----------|----------|
| March#Low Minority/Poverty ZIP  |  | .02134   | .0012059 | 17.70 | 0.000 | .0189765 | .0237036 |
| March#High Minority/Poverty ZIP |  | .0220035 | .0018746 | 11.74 | 0.000 | .0183294 | .0256776 |
| April#Low Minority/Poverty ZIP  |  | .0228712 | .0013208 | 17.32 | 0.000 | .0202824 | .02546   |
| April#High Minority/Poverty ZIP |  | .0283193 | .0027508 | 10.29 | 0.000 | .0229278 | .0337108 |
| May#Low Minority/Poverty ZIP    |  | .0204016 | .0012414 | 16.43 | 0.000 | .0179685 | .0228347 |
| May#High Minority/Poverty ZIP   |  | .0214566 | .0024826 | 8.64  | 0.000 | .0165909 | .0263223 |
| June#Low Minority/Poverty ZIP   |  | .0182832 | .0009811 | 18.64 | 0.000 | .0163603 | .020206  |
| June#High Minority/Poverty ZIP  |  | .0184806 | .001666  | 11.09 | 0.000 | .0152154 | .0217459 |

---

## 8. ICD-10 codes used to categorize medical admissions by primary diagnosis.

Notes: We relied on the primary diagnosis supplied by the admitting physician and recorded on the corresponding professional claim. The 20 medical conditions on which this analysis was based represent the most common diagnoses among patients admitted to hospital medicine, based on a previous analysis of discharge DRGs by Sound Physicians. ICD-10 codes comprising each of the 20 conditions were selected by consensus of clinicians serving on Sound's clinical quality committee.

| Medical Condition                          | ICD-10 Code                                                                                    | Description                                                                                        |
|--------------------------------------------|------------------------------------------------------------------------------------------------|----------------------------------------------------------------------------------------------------|
| Abdominal pain, nausea, vomiting, diarrhea | A04.5                                                                                          | Campylobacter enteritis                                                                            |
|                                            | A04.7                                                                                          | Enterocolitis due to Clostridium difficile                                                         |
|                                            | A08.4                                                                                          | Viral intestinal infection, unspecified                                                            |
|                                            | A09                                                                                            | Infectious gastroenteritis and colitis, unspecified                                                |
|                                            | G43.A0                                                                                         | Cyclical vomiting, not intractable                                                                 |
|                                            | K20.9                                                                                          | Esophagitis, unspecified                                                                           |
|                                            | K21.9                                                                                          | Gastro-esophageal reflux disease without esophagitis                                               |
|                                            | K22.10                                                                                         | Ulcer of esophagus without bleeding                                                                |
|                                            | K22.2                                                                                          | Esophageal obstruction                                                                             |
|                                            | K25.9                                                                                          | Gastric ulcer, unspecified as acute or chronic, without hemorrhage or perforation                  |
|                                            | K26.9                                                                                          | Duodenal ulcer, unspecified as acute or chronic, without hemorrhage or perforation                 |
|                                            | K27.9                                                                                          | Peptic ulcer, site unspecified, unspecified as acute or chronic, without hemorrhage or perforation |
|                                            | K29.00                                                                                         | Acute gastritis without bleeding                                                                   |
|                                            | K29.20                                                                                         | Alcoholic gastritis without bleeding                                                               |
|                                            | K29.70                                                                                         | Gastritis, unspecified, without bleeding                                                           |
|                                            | K29.80                                                                                         | Duodenitis without bleeding                                                                        |
|                                            | K31.84                                                                                         | Gastroparesis                                                                                      |
|                                            | K52.9                                                                                          | Noninfective gastroenteritis and colitis, unspecified                                              |
|                                            | K57.20                                                                                         | Diverticulitis of large intestine with perforation and abscess without bleeding                    |
|                                            | K57.31                                                                                         | Diverticulosis of large intestine without perforation or abscess with bleeding                     |
| K57.32                                     | Diverticulitis of large intestine without perforation or abscess without bleeding              |                                                                                                    |
| K57.80                                     | Diverticulitis of intestine, part unspecified, with perforation and abscess without bleeding   |                                                                                                    |
| K57.92                                     | Diverticulitis of intestine, part unspecified, without perforation or abscess without bleeding |                                                                                                    |
| K59.00                                     | Constipation, unspecified                                                                      |                                                                                                    |
| R10.11                                     | Right upper quadrant pain                                                                      |                                                                                                    |
| R10.13                                     | Epigastric pain                                                                                |                                                                                                    |
| R10.30                                     | Lower abdominal pain, unspecified                                                              |                                                                                                    |
| R10.31                                     | Right lower quadrant pain                                                                      |                                                                                                    |
| R10.32                                     | Left lower quadrant pain                                                                       |                                                                                                    |
| R10.84                                     | Generalized abdominal pain                                                                     |                                                                                                    |
|                                            | R10.9                                                                                          | Unspecified abdominal pain                                                                         |
|                                            | R11.0                                                                                          | Nausea                                                                                             |
|                                            | R11.10                                                                                         | Vomiting, unspecified                                                                              |

|                                |         |                                                                                             |
|--------------------------------|---------|---------------------------------------------------------------------------------------------|
|                                | R11.2   | Nausea with vomiting, unspecified                                                           |
|                                | R19.7   | Diarrhea, unspecified                                                                       |
| Acute myocardial infarction    | I21.09  | ST elevation (STEMI) myocardial infarction involving other coronary artery of anterior wall |
|                                | I21.11  | ST elevation (STEMI) myocardial infarction involving right coronary artery                  |
|                                | I21.19  | ST elevation (STEMI) myocardial infarction involving other coronary artery of inferior wall |
|                                | I21.3   | ST elevation (STEMI) myocardial infarction of unspecified site                              |
|                                | I21.4   | Non-ST elevation (NSTEMI) myocardial infarction                                             |
| Alcohol related                | F10.129 | Alcohol abuse with intoxication, unspecified                                                |
|                                | F10.20  | Alcohol dependence, uncomplicated                                                           |
|                                | F10.230 | Alcohol dependence with withdrawal, uncomplicated                                           |
|                                | F10.231 | Alcohol dependence with withdrawal delirium                                                 |
|                                | F10.239 | Alcohol dependence with withdrawal, unspecified                                             |
|                                | F10.929 | Alcohol use, unspecified with intoxication, unspecified                                     |
|                                | K70.10  | Alcoholic hepatitis without ascites                                                         |
|                                | K70.30  | Alcoholic cirrhosis of liver without ascites                                                |
|                                | K70.31  | Alcoholic cirrhosis of liver with ascites                                                   |
|                                | J96.00  | Acute respiratory failure, unspecified whether with hypoxia or hypercapnia                  |
| Altered mental status/weakness | F03.90  | Unspecified dementia without behavioral disturbance                                         |
|                                | F03.91  | Unspecified dementia with behavioral disturbance                                            |
|                                | F05     | Delirium due to known physiological condition                                               |
|                                | G92     | Toxic encephalopathy                                                                        |
|                                | G93.40  | Encephalopathy, unspecified                                                                 |
|                                | G93.41  | Metabolic encephalopathy                                                                    |
|                                | G93.9   | Disorder of brain, unspecified                                                              |
|                                | I67.4   | Hypertensive encephalopathy                                                                 |
| Arrhythmia                     | I44.1   | Atrioventricular block, second degree                                                       |
|                                | I44.2   | Atrioventricular block, complete                                                            |
|                                | I45.5   | Other specified heart block                                                                 |
|                                | I45.9   | Conduction disorder, unspecified                                                            |
|                                | I46.9   | Cardiac arrest, cause unspecified                                                           |
|                                | I47.1   | Supraventricular tachycardia                                                                |
|                                | I47.2   | Ventricular tachycardia                                                                     |
|                                | I48.0   | Paroxysmal atrial fibrillation                                                              |
|                                | I48.1   | Persistent atrial fibrillation                                                              |
|                                | I48.2   | Chronic atrial fibrillation                                                                 |
|                                |         | I48.91                                                                                      |
|                                | I48.92  | Unspecified atrial flutter                                                                  |
|                                | I49.01  | Ventricular fibrillation                                                                    |
|                                | I49.5   | Sick sinus syndrome                                                                         |
|                                | I49.8   | Other specified cardiac arrhythmias                                                         |
|                                | I49.9   | Cardiac arrhythmia, unspecified                                                             |
|                                | R00.1   | Bradycardia, unspecified                                                                    |

|                                                                                    |                       |                                                                                          |
|------------------------------------------------------------------------------------|-----------------------|------------------------------------------------------------------------------------------|
| Chest pain excluding AMI                                                           | I20.0                 | Unstable angina                                                                          |
|                                                                                    | I20.8                 | Other forms of angina pectoris                                                           |
|                                                                                    | I20.9                 | Angina pectoris, unspecified                                                             |
|                                                                                    | I24.8                 | Other forms of acute ischemic heart disease                                              |
|                                                                                    | I24.9                 | Acute ischemic heart disease, unspecified                                                |
|                                                                                    | R07.89                | Other chest pain                                                                         |
|                                                                                    | R07.9                 | Chest pain, unspecified                                                                  |
| Congestive heart failure (CHF) exacerbation                                        | E87.70                | Fluid overload, unspecified                                                              |
|                                                                                    | I50.1                 | Left ventricular failure                                                                 |
|                                                                                    | I50.20                | Unspecified systolic (congestive) heart failure                                          |
|                                                                                    | I50.21                | Acute systolic (congestive) heart failure                                                |
|                                                                                    | I50.23                | Acute on chronic systolic (congestive) heart failure                                     |
|                                                                                    | I50.30                | Unspecified diastolic (congestive) heart failure                                         |
|                                                                                    | I50.31                | Acute diastolic (congestive) heart failure                                               |
|                                                                                    | I50.33                | Acute on chronic diastolic (congestive) heart failure                                    |
|                                                                                    | I50.41                | Acute combined systolic (congestive) and diastolic (congestive) heart failure            |
|                                                                                    | I50.43                | Acute on chronic combined systolic (congestive) and diastolic (congestive) heart failure |
|                                                                                    | I50.9                 | Heart failure, unspecified                                                               |
|                                                                                    | I51.81                | Takotsubo syndrome                                                                       |
| J81.0                                                                              | Acute pulmonary edema |                                                                                          |
| Chronic obstructive pulmonary disease (COPD)/Asthma exacerbation                   | J44.0                 | Chronic obstructive pulmonary disease with acute lower respiratory infection             |
|                                                                                    | J44.1                 | Chronic obstructive pulmonary disease with (acute) exacerbation                          |
|                                                                                    | J44.9                 | Chronic obstructive pulmonary disease, unspecified                                       |
|                                                                                    | J45.901               | Unspecified asthma with (acute) exacerbation                                             |
|                                                                                    | J45.902               | Unspecified asthma with status asthmaticus                                               |
|                                                                                    | J45.909               | Unspecified asthma, uncomplicated                                                        |
|                                                                                    | J47.1                 | Bronchiectasis with (acute) exacerbation                                                 |
| Dehydration, electrolyte abnormalities, acute and/or chronic kidney injury/disease | E83.42                | Hypomagnesemia                                                                           |
|                                                                                    | E83.51                | Hypocalcemia                                                                             |
|                                                                                    | E83.52                | Hypercalcemia                                                                            |
|                                                                                    | 86.0                  | Dehydration                                                                              |
|                                                                                    | E86.1                 | Hypovolemia                                                                              |
|                                                                                    | E86.9                 | Volume depletion, unspecified                                                            |
|                                                                                    | E87.0                 | Hyperosmolality and hypernatremia                                                        |
|                                                                                    | E87.1                 | Hypo-osmolality and hyponatremia                                                         |
|                                                                                    | E87.3                 | Alkalosis                                                                                |
|                                                                                    | E87.6                 | Hypokalemia                                                                              |
|                                                                                    | N10                   | Acute tubulo-interstitial nephritis                                                      |
|                                                                                    | N12                   | Tubulo-interstitial nephritis, not specified as acute or chronic                         |
|                                                                                    | N17.0                 | Acute kidney failure with tubular necrosis                                               |
|                                                                                    | N17.9                 | Acute kidney failure, unspecified                                                        |
|                                                                                    | N18.3                 | Chronic kidney disease, stage 3 (moderate)                                               |

|                           |          |                                                                                                  |
|---------------------------|----------|--------------------------------------------------------------------------------------------------|
|                           | N18.4    | Chronic kidney disease, stage 4 (severe)                                                         |
|                           | N18.5    | Chronic kidney disease, stage 5                                                                  |
|                           | N18.6    | End stage renal disease                                                                          |
|                           | N18.9    | Chronic kidney disease, unspecified                                                              |
|                           | N19      | Unspecified kidney failure                                                                       |
| Diabetes related          | E10.10   | Type 1 diabetes mellitus with ketoacidosis without coma                                          |
|                           | E10.65   | Type 1 diabetes mellitus with hyperglycemia                                                      |
|                           | E10.9    | Type 1 diabetes mellitus without complications                                                   |
|                           | E11.00   | Type 2 diabetes mellitus with hyperosmolarity without nonketotic hyperglycemic-hyperosmolar coma |
|                           | E11.01   | Type 2 diabetes mellitus with hyperosmolarity with coma                                          |
|                           | E11.22   | Type 2 diabetes mellitus with diabetic chronic kidney disease                                    |
|                           | E11.29   | Type 2 diabetes mellitus with other diabetic kidney complication                                 |
|                           | E11.40   | Type 2 diabetes mellitus with diabetic neuropathy, unspecified                                   |
|                           | E11.43   | Type 2 diabetes mellitus with diabetic autonomic (poly)neuropathy                                |
|                           | E11.52   | Type 2 diabetes mellitus with diabetic peripheral angiopathy with gangrene                       |
|                           | E11.621  | Type 2 diabetes mellitus with foot ulcer                                                         |
|                           | E11.649  | Type 2 diabetes mellitus with hypoglycemia without coma                                          |
|                           | E11.65   | Type 2 diabetes mellitus with hyperglycemia                                                      |
|                           | E11.69   | Type 2 diabetes mellitus with other specified complication                                       |
|                           | E11.8    | Type 2 diabetes mellitus with unspecified complications                                          |
|                           | E11.9    | Type 2 diabetes mellitus without complications                                                   |
|                           | E13.10   | Other specified diabetes mellitus with ketoacidosis without coma                                 |
|                           | E16.2    | Hypoglycemia, unspecified                                                                        |
|                           | R73.9    | Hyperglycemia, unspecified                                                                       |
| Gastrointestinal bleeding | K26.4    | Chronic or unspecified duodenal ulcer with hemorrhage                                            |
|                           | K62.5    | Hemorrhage of anus and rectum                                                                    |
|                           | K92.0    | Hematemesis                                                                                      |
|                           | K92.1    | Melena                                                                                           |
|                           | K92.2    | Gastrointestinal hemorrhage, unspecified                                                         |
|                           | K83.8    | Other specified diseases of biliary tract                                                        |
| Hip Fracture              | S72.002A | Fracture of unspecified part of neck of left femur, initial encounter for closed fracture        |
|                           | S72.009A | Fracture of unspecified part of neck of unspecified femur, initial encounter for closed fracture |
|                           | S72.141A | Displaced intertrochanteric fracture of right femur, initial encounter for closed fracture       |
|                           | S72.142A | Displaced intertrochanteric fracture of left femur, initial encounter for closed fracture        |
|                           | S72.143A | Displaced intertrochanteric fracture of unspecified femur, initial encounter for closed fracture |
|                           | S72.302A | Unspecified fracture of shaft of left femur, initial encounter for closed fracture               |
|                           | S72.409A | Unspecified fracture of lower end of unspecified femur, initial encounter for closed fracture    |
|                           | S72.90XA | Unspecified fracture of unspecified femur, initial encounter for closed fracture                 |
|                           | S72.91XA | Unspecified fracture of right femur, initial encounter for closed fracture                       |
|                           | S72.92XA | Unspecified fracture of left femur, initial encounter for closed fracture                        |
| Pancreatitis              | K85.1    | Biliary acute pancreatitis                                                                       |
|                           | K85.10   | Biliary acute pancreatitis without necrosis or infection                                         |

|                            |          |                                                                                                         |
|----------------------------|----------|---------------------------------------------------------------------------------------------------------|
|                            | K85.2    | Alcohol induced acute pancreatitis                                                                      |
|                            | K85.20   | Alcohol induced acute pancreatitis without necrosis or infection                                        |
|                            | K85.9    | Acute pancreatitis, unspecified                                                                         |
|                            | K85.90   | Acute pancreatitis without necrosis or infection, unspecified                                           |
|                            | K85.91   | Acute pancreatitis with uninfected necrosis, unspecified                                                |
|                            | K86.0    | Alcohol-induced chronic pancreatitis                                                                    |
|                            | K86.1    | Other chronic pancreatitis                                                                              |
|                            | J11.00   | Influenza due to unidentified influenza virus with unspecified type of pneumonia                        |
| Pneumonia                  | J13      | Pneumonia due to Streptococcus pneumoniae                                                               |
|                            | J15.1    | Pneumonia due to Pseudomonas                                                                            |
|                            | J15.212  | Pneumonia due to Methicillin resistant Staphylococcus aureus                                            |
|                            | J15.6    | Pneumonia due to other aerobic Gram-negative bacteria                                                   |
|                            | J15.9    | Unspecified bacterial pneumonia                                                                         |
|                            | J18.1    | Lobar pneumonia, unspecified organism                                                                   |
|                            | J18.9    | Pneumonia, unspecified organism                                                                         |
|                            | J69.0    | Pneumonitis due to inhalation of food and vomit                                                         |
|                            | G40.409  | Other generalized epilepsy and epileptic syndromes, not intractable, without status epilepticus         |
| Respiratory failure        | J96.01   | Acute respiratory failure with hypoxia                                                                  |
|                            | J96.02   | Acute respiratory failure with hypercapnia                                                              |
|                            | J96.20   | Acute and chronic respiratory failure, unspecified whether with hypoxia or hypercapnia                  |
|                            | J96.21   | Acute and chronic respiratory failure with hypoxia                                                      |
|                            | J96.22   | Acute and chronic respiratory failure with hypercapnia                                                  |
|                            | J96.90   | Respiratory failure, unspecified, unspecified whether with hypoxia or hypercapnia                       |
|                            | J96.91   | Respiratory failure, unspecified with hypoxia                                                           |
|                            | J96.92   | Respiratory failure, unspecified with hypercapnia                                                       |
|                            | S72.001A | Fracture of unspecified part of neck of right femur, initial encounter for closed fracture              |
| Seizure / seizure disorder | G40.901  | Epilepsy, unspecified, not intractable, with status epilepticus                                         |
|                            | G40.909  | Epilepsy, unspecified, not intractable, without status epilepticus                                      |
|                            | G40.919  | Epilepsy, unspecified, intractable, without status epilepticus                                          |
|                            | R56.9    | Unspecified convulsions                                                                                 |
|                            | A41.01   | Sepsis due to Methicillin susceptible Staphylococcus aureus                                             |
| Sepsis & septic shock      | A41.02   | Sepsis due to Methicillin resistant Staphylococcus aureus                                               |
|                            | A41.4    | Sepsis due to anaerobes                                                                                 |
|                            | A41.50   | Gram-negative sepsis, unspecified                                                                       |
|                            | A41.51   | Sepsis due to Escherichia coli [E. coli]                                                                |
|                            | A41.9    | Sepsis, unspecified organism                                                                            |
|                            | I95.9    | Hypotension, unspecified                                                                                |
|                            | R57.0    | Cardiogenic shock                                                                                       |
|                            | R57.1    | Hypovolemic shock                                                                                       |
|                            | R57.9    | Shock, unspecified                                                                                      |
|                            | R65.10   | Systemic inflammatory response syndrome (SIRS) of non-infectious origin without acute organ dysfunction |

|                                 |                                       |                                                                                  |
|---------------------------------|---------------------------------------|----------------------------------------------------------------------------------|
|                                 | R78.81                                | Bacteremia                                                                       |
|                                 | A49.01                                | Methicillin susceptible <i>Staphylococcus aureus</i> infection, unspecified site |
| Skin and soft tissue infections | A49.02                                | Methicillin resistant <i>Staphylococcus aureus</i> infection, unspecified site   |
|                                 | E08.621                               | Diabetes mellitus due to underlying condition with foot ulcer                    |
|                                 | I96                                   | Gangrene, not elsewhere classified                                               |
|                                 | K12.2                                 | Cellulitis and abscess of mouth                                                  |
|                                 | L02.01                                | Cutaneous abscess of face                                                        |
|                                 | L02.11                                | Cutaneous abscess of neck                                                        |
|                                 | L02.211                               | Cutaneous abscess of abdominal wall                                              |
|                                 | L02.214                               | Cutaneous abscess of groin                                                       |
|                                 | L02.215                               | Cutaneous abscess of perineum                                                    |
|                                 | L02.31                                | Cutaneous abscess of buttock                                                     |
|                                 | L02.413                               | Cutaneous abscess of right upper limb                                            |
|                                 | L02.414                               | Cutaneous abscess of left upper limb                                             |
|                                 | L02.415                               | Cutaneous abscess of right lower limb                                            |
|                                 | L02.416                               | Cutaneous abscess of left lower limb                                             |
|                                 | L02.419                               | Cutaneous abscess of limb, unspecified                                           |
|                                 | L02.511                               | Cutaneous abscess of right hand                                                  |
|                                 | L02.512                               | Cutaneous abscess of left hand                                                   |
| L02.519                         | Cutaneous abscess of unspecified hand |                                                                                  |
|                                 | L02.611                               | Cutaneous abscess of right foot                                                  |
|                                 | L02.612                               | Cutaneous abscess of left foot                                                   |
|                                 | L02.91                                | Cutaneous abscess, unspecified                                                   |
|                                 | L03.011                               | Cellulitis of right finger                                                       |
|                                 | L03.012                               | Cellulitis of left finger                                                        |
|                                 | L03.019                               | Cellulitis of unspecified finger                                                 |
|                                 | L03.031                               | Cellulitis of right toe                                                          |
|                                 | L03.032                               | Cellulitis of left toe                                                           |
|                                 | L03.113                               | Cellulitis of right upper limb                                                   |
|                                 | L03.114                               | Cellulitis of left upper limb                                                    |
|                                 | L03.115                               | Cellulitis of right lower limb                                                   |
|                                 | L03.116                               | Cellulitis of left lower limb                                                    |
|                                 | L03.119                               | Cellulitis of unspecified part of limb                                           |
|                                 | L03.211                               | Cellulitis of face                                                               |
|                                 | L03.221                               | Cellulitis of neck                                                               |
|                                 | L03.311                               | Cellulitis of abdominal wall                                                     |
|                                 | L03.313                               | Cellulitis of chest wall                                                         |
|                                 | L03.314                               | Cellulitis of groin                                                              |
|                                 | L03.317                               | Cellulitis of buttock                                                            |
|                                 | L03.319                               | Cellulitis of trunk, unspecified                                                 |
| L03.818                         | Cellulitis of other sites             |                                                                                  |
| L03.90                          | Cellulitis, unspecified               |                                                                                  |

|                                                    |         |                                                                                              |
|----------------------------------------------------|---------|----------------------------------------------------------------------------------------------|
|                                                    | L08.9   | Local infection of the skin and subcutaneous tissue, unspecified                             |
|                                                    | L73.2   | Hidradenitis suppurativa                                                                     |
|                                                    | L89.154 | Pressure ulcer of sacral region, stage 4                                                     |
|                                                    | L89.159 | Pressure ulcer of sacral region, unspecified stage                                           |
|                                                    | L89.90  | Pressure ulcer of unspecified site, unspecified stage                                        |
|                                                    | L89.94  | Pressure ulcer of unspecified site, stage 4                                                  |
|                                                    | I60.9   | Nontraumatic subarachnoid hemorrhage, unspecified                                            |
| Stroke                                             | I61.9   | Nontraumatic intracerebral hemorrhage, unspecified                                           |
|                                                    | I62.9   | Nontraumatic intracranial hemorrhage, unspecified                                            |
|                                                    | I63.50  | Cerebral infarction due to unspecified occlusion or stenosis of unspecified cerebral artery  |
|                                                    | I63.511 | Cerebral infarction due to unspecified occlusion or stenosis of right middle cerebral artery |
|                                                    | I63.512 | Cerebral infarction due to unspecified occlusion or stenosis of left middle cerebral artery  |
|                                                    | I63.9   | Cerebral infarction, unspecified                                                             |
|                                                    | R55     | Syncope and collapse                                                                         |
| Syncope                                            | G45.4   | Transient global amnesia                                                                     |
| TIA                                                | G45.9   | Transient cerebral ischemic attack, unspecified                                              |
|                                                    | N13.2   | Hydronephrosis with renal and ureteral calculous obstruction                                 |
| Urinary tract infection<br>(upper and lower tract) | N13.30  | Unspecified hydronephrosis                                                                   |
|                                                    | N20.0   | Calculus of kidney                                                                           |
|                                                    | N20.1   | Calculus of ureter                                                                           |
|                                                    | N20.9   | Urinary calculus, unspecified                                                                |
|                                                    | N30.00  | Acute cystitis without hematuria                                                             |
|                                                    | N30.01  | Acute cystitis with hematuria                                                                |
|                                                    | N30.90  | Cystitis, unspecified without hematuria                                                      |
|                                                    | N39.0   | Urinary tract infection, site not specified                                                  |
|                                                    | F10.10  | Alcohol abuse, uncomplicated                                                                 |



## 9. Supplemental exhibits

### Supplemental Exhibit 1

Total medical admissions and non-COVID-19 medical admissions by week: 2019 & 2020

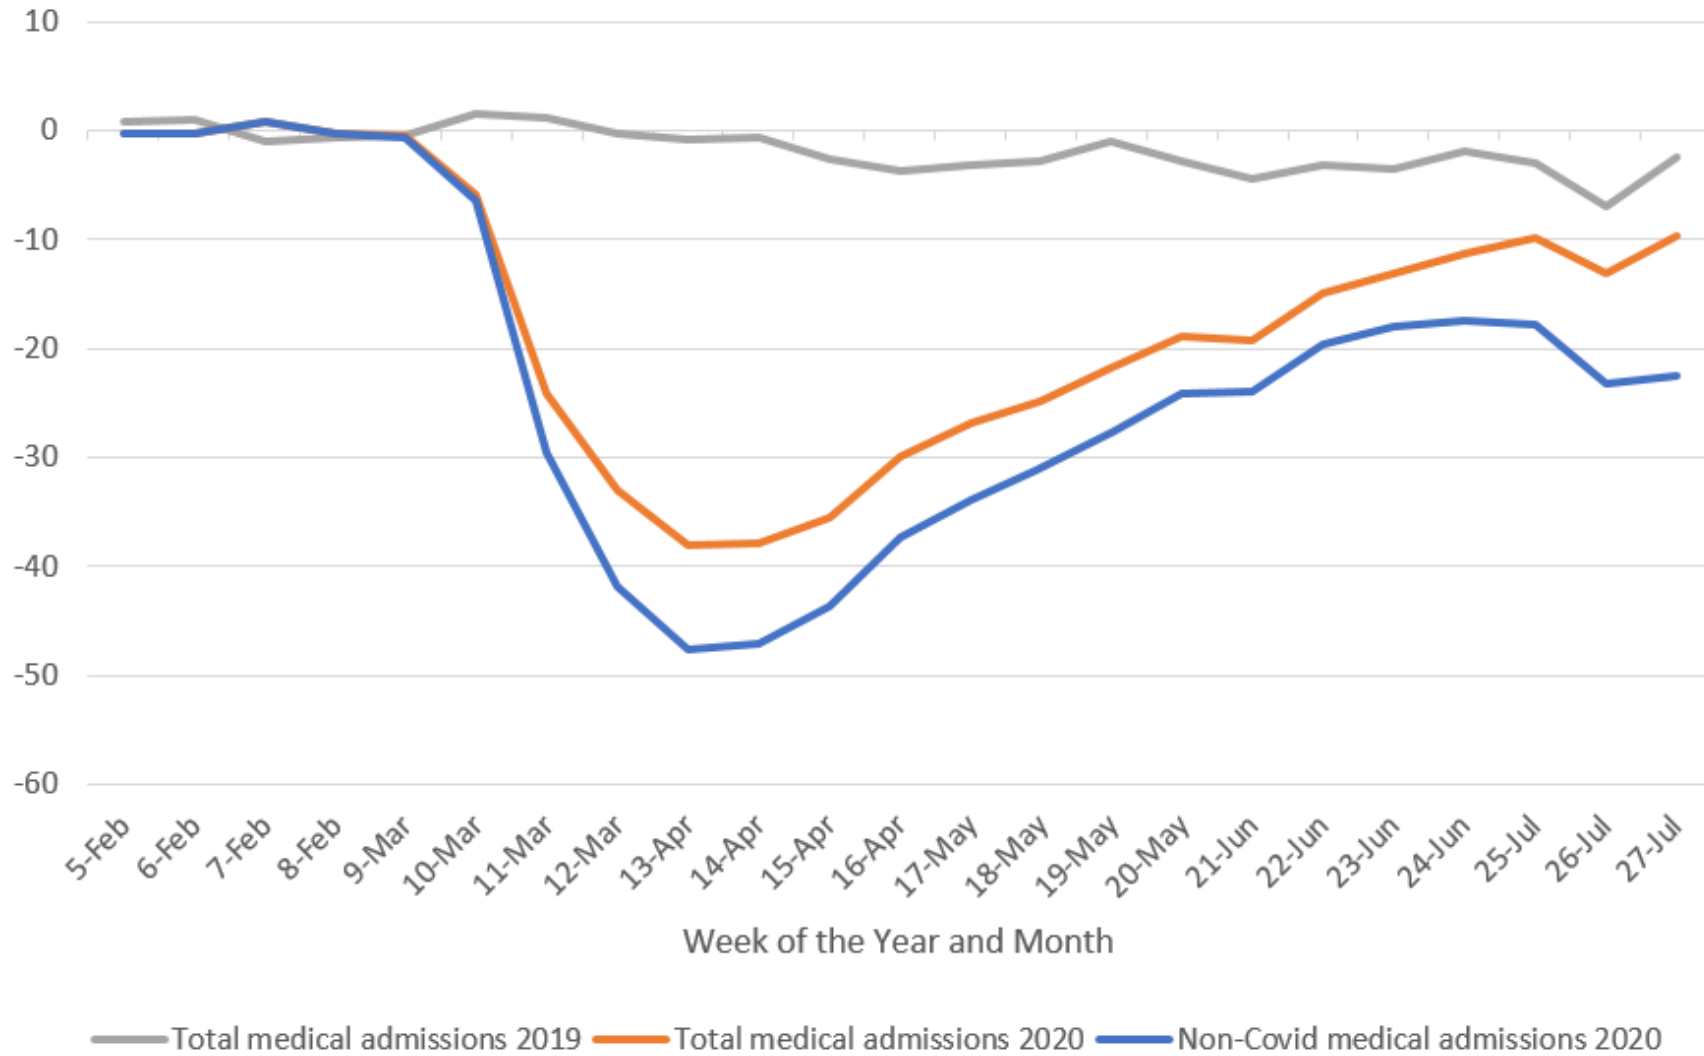

SOURCE Data from Sound Physician Hospital Admissions. NOTES N = 1,056,951. Non-Covid-19 admissions exclude all suspected or confirmed Covid-19 admissions based on physician response to a specific prompt in the electronic medical record at admission starting in Week 10, which

corresponds to the beginning of the pandemic. The percentage decline is relative to the average weekly admissions during February (Week 5-8). Week 5 corresponds to February 2-8, and Week 27 to July 5-11, 2020.

## Supplemental Exhibit 2

Changes in all medical admissions and non-COVID-19 medical admissions relative to baseline: Total and by subgroup, 2020

| Patient Subgroup<br>(N of sample at<br>2020 Baseline) | Sample<br>Size at<br>Baseline | <i>Non-COVID-19 admissions</i> |                                      | <i>All medical admissions</i>  |                                      |
|-------------------------------------------------------|-------------------------------|--------------------------------|--------------------------------------|--------------------------------|--------------------------------------|
|                                                       |                               | Nadir<br>(April)<br>Change (%) | Rebound<br>(June/July)<br>Change (%) | Nadir<br>(April)<br>Change (%) | Rebound<br>(June/July)<br>Change (%) |
| Overall                                               | 105,688                       | -42.8                          | -15.9                                | -34.1                          | -8.3                                 |
| <b>Race, Ethnicity and Poverty Status</b>             |                               |                                |                                      |                                |                                      |
| Zip > 50% Black                                       | 5,140                         | -45.2                          | -11.9                                | -30.1                          | -2.3 <sup>a</sup>                    |
| Zip > 50% Hispanic                                    | 9,161                         | -44.2                          | -31.8                                | -34.8                          | -14.1                                |
| Zip > 25% Poverty                                     | 6,761                         | -44.0                          | -16.7                                | -31.5                          | -2.7                                 |
| <b>Insurance Status</b>                               |                               |                                |                                      |                                |                                      |
| Medicaid                                              | 13,009                        | -41.4                          | -9.7                                 | -31.2                          | -2.5                                 |
| Self-Pay                                              | 2,922                         | -37.7                          | -20.3                                | -27.3                          | -3.7                                 |
| <b>Age</b>                                            |                               |                                |                                      |                                |                                      |
| Old (70+)                                             | 42,384                        | -45.4                          | -19.1                                | -37.5                          | -13.2                                |
| Young (< 50)                                          | 23,636                        | -39.3                          | -13.4                                | -30.4                          | -3.4                                 |
| <b>Hospital COVID-19 Volume</b>                       |                               |                                |                                      |                                |                                      |
| Highest quintile                                      | 21,285                        | -50.0                          | -23.3                                | -31.2                          | -9.9                                 |
| Lowest quintile                                       | 21,231                        | -39.5                          | -6.8                                 | -36.5                          | -5.5                                 |

Source: Data from Sound Physician Hospital Admissions.

Notes: These estimates adjust for seasonality by use of the corresponding weeks for 2019 data. The sample size is for the initial (baseline) February 2020 admissions. All differences in utilization, relative to the seasonally adjusted baseline, are significant at the 0.05 level except for one coefficient marked with an (a). See Appendix for details regarding estimates of confidence intervals.

### Supplemental Exhibit 3

Changes in all medical admissions and non-COVID-19 medical admissions by diagnosis, 2020 relative to equivalent periods in 2019

| Disease Subgroup                                          | <i>Non-COVID-19 admissions</i> |                          |                                | <i>All medical admissions</i> |                                |
|-----------------------------------------------------------|--------------------------------|--------------------------|--------------------------------|-------------------------------|--------------------------------|
|                                                           | Sample Size at Baseline        | Nadir (April) Change (%) | Rebound (June/July) Change (%) | Nadir (April) Change (%)      | Rebound (June/July) Change (%) |
| <b>Pancreatitis</b>                                       | 1,151                          | -23.7                    | -4.5 <sup>a</sup>              | -22.4                         | -2.9 <sup>a</sup>              |
| <b>Stroke</b>                                             | 2,350                          | -24.7                    | -16.9                          | -23.1                         | -15.8                          |
| <b>Altered Mental Status</b>                              | 2,251                          | -27.1                    | -15.5                          | -18.9                         | -11.2                          |
| <b>Alcohol-Related</b>                                    | 1,042                          | -32.6                    | 4.3 <sup>a</sup>               | -30.5                         | 5.8 <sup>a</sup>               |
| <b>Dehydration</b>                                        | 4,446                          | -33.7                    | -12.5                          | -29.4                         | -9.7                           |
| <b>Acute ST Elevation Myocardial Infarction</b>           | 416                            | -34.9                    | -22.2                          | -33.1                         | -21.1                          |
| <b>Diabetes</b>                                           | 2,283                          | -38.5                    | 0.8 <sup>a</sup>               | -35.8                         | 3.5 <sup>a</sup>               |
| <b>Gastrointestinal Bleeding</b>                          | 4,042                          | -38.8                    | -11.9                          | -36.9                         | -9.7                           |
| <b>Sepsis and Sepsis Shock</b>                            | 6,712                          | -40.1                    | -25.1                          | -24.8                         | -14.4                          |
| <b>Acute Myocardial Infarction (Non-ST-Elevation)</b>     | 1,568                          | -42.2                    | -16.1                          | -39.4                         | -14.4                          |
| <b>Skin and Soft Tissue Infection</b>                     | 2,806                          | -44.0                    | -19.0                          | -42.5                         | -18.1                          |
| <b>Respiratory Failure</b>                                | 5,986                          | -44.8                    | -21.0                          | -11.8                         | 11.1                           |
| <b>Chest Pain (Excluding Acute Myocardial Infarction)</b> | 7,383                          | -46.0                    | -14.6                          | -44.0                         | -13.0                          |
| <b>Arrhythmia</b>                                         | 3,626                          | -47.2                    | -14.7                          | -44.2                         | -12.3                          |
| <b>Congestive Heart Failure</b>                           | 3,878                          | -47.5                    | -20.1                          | -43.8                         | -17.8                          |
| <b>Abdominal Pain</b>                                     | 4,893                          | -48.5                    | -14.4                          | -46.1                         | -11.9                          |
| <b>Urinary Tract Infection</b>                            | 2,296                          | -48.5                    | -24.3                          | -46.2                         | -22.0                          |
| <b>Transient Ischemic Attack</b>                          | 1,082                          | -50.9                    | -11.4                          | -50.0                         | -10.8                          |
| <b>Pneumonia</b>                                          | 3,953                          | -53.6                    | -44.1                          | -16.0                         | -19.6                          |
| <b>Chronic Obstructive Pulmonary Disease / Asthma</b>     | 3,192                          | -68.6                    | -40.1                          | -61.6                         | -35.5                          |

Source: Data from Sound Physician Hospital Admissions.

Notes: Diagnostic category based on initial diagnosis code at admission. All results are statistically significant at the .05 level unless noted with an (a). All confidence intervals (and sample size) reported in the Appendix.

### Supplemental Exhibit 4

Adjusted in-hospital mortality for non-COVID-19 medical admissions: By minority or poverty status in the patient's zip code (February-June, 2020)

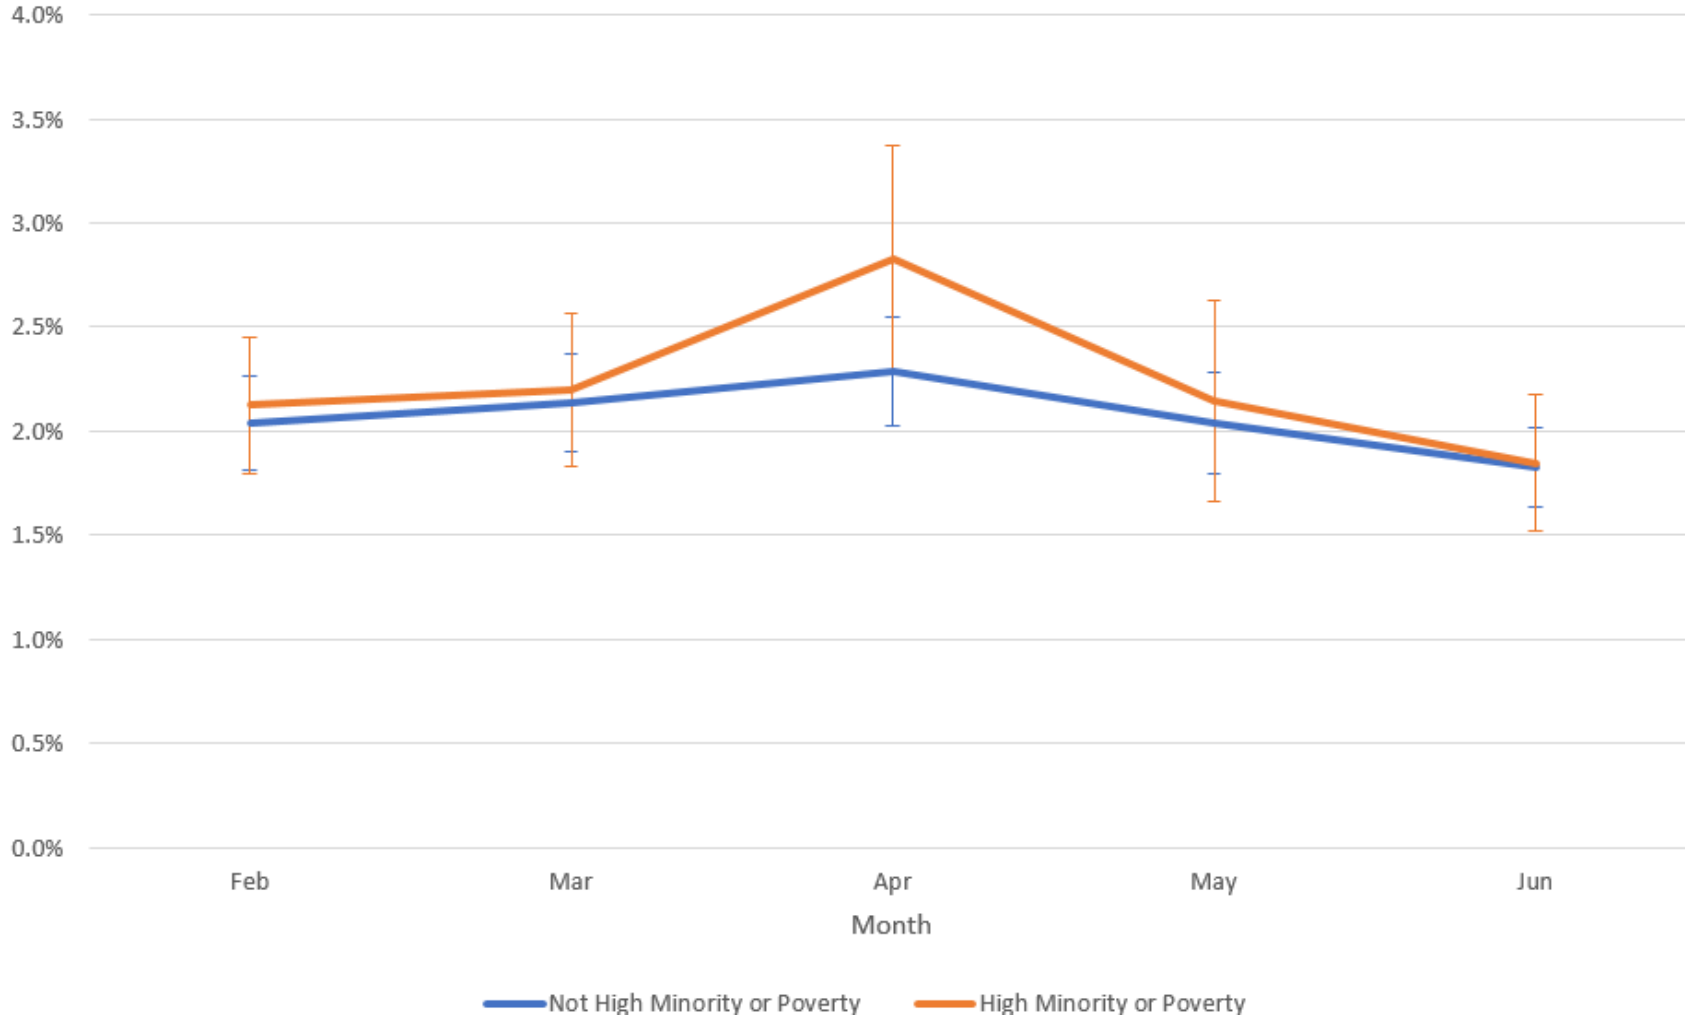

SOURCE Data from Sound Physician Hospital Admissions. NOTES The orange line corresponds to estimates for patients living in zip codes with either majority-Black or majority-Hispanic populations, or those with poverty rates over 25%; the blue line denotes all other patients. Estimates are from a logistic regression that adjusts for diagnosis, age, sex, and month-by-year-by-high minority/poverty zip code categorical variables. The weeks correspond to months as follows: February (Weeks 5-8), March (Weeks 9-12), April (Weeks 13-17), May (Weeks 18-21) and June (Weeks 22-26). See the Appendix for the full regression analysis.
